# Supplementary material for: High-efficiency polymer solar cells employing solution-processible and thickness-independent gallium-doped zinc oxide nanoparticles as cathode buffer layers
Source: Royal Society of Chemistry journal article supplement (doi:10.1039/c6tc04366f), 2016-01-01
Supplement: c6tc04366f1.pdf [file c6tc04366f1.pdf]

## Supporting Information for

High-efficiency polymer solar cells employing solution-processible and thickness-independent gallium-doped zinc oxide nanoparticles as a cathode buffer layer

Jiantai Wang,<sup>a</sup> Chi Yan,<sup>ab</sup> Xiaoqin Zhang,<sup>ab</sup> Xiaofei Zhao,<sup>ab</sup> Yingying Fu,<sup>a</sup> Baohua Zhang<sup>a</sup> and Zhiyuan Xie.\*<sup>a</sup>

<sup>a</sup>State Key Laboratory of Polymer Physics and Chemistry, Changchun Institute of Applied Chemistry, Chinese Academy of Sciences, Changchun 130022, P. R. China.

<sup>b</sup>University of Chinese Academy of Sciences, Beijing 100039, P. R. China.

\*Correspondence - xiezy\_n@ciac.jl.cn

**Table S1.** The final Ga/Zn molar ratio with different initial molar ratio of Ga/Zn atom.  
(detection with ICP-AES)

|                      | $\text{Ga}^{3+}$<br>in ZnO | $\text{Ga}^{3+}$<br>in ZnO:Ga | $\text{Ga}^{3+}$<br>in ZnO | $\text{Ga}^{3+}$<br>in ZnO:Ga | $\text{Ga}^{3+}$<br>in ZnO:Ga |
|----------------------|----------------------------|-------------------------------|----------------------------|-------------------------------|-------------------------------|
| <b>Initial ratio</b> | 0%                         | 0.5%                          | 1%                         | 3%                            | 5%                            |
| <b>Ink</b>           | 0%                         | 0.31%                         | 0.51%                      | 1.43%                         | 2.48%                         |

Initial ratio: atomic amount ratio in the initial methanol solution

Ink: the atomic amount ratio in the resultant products

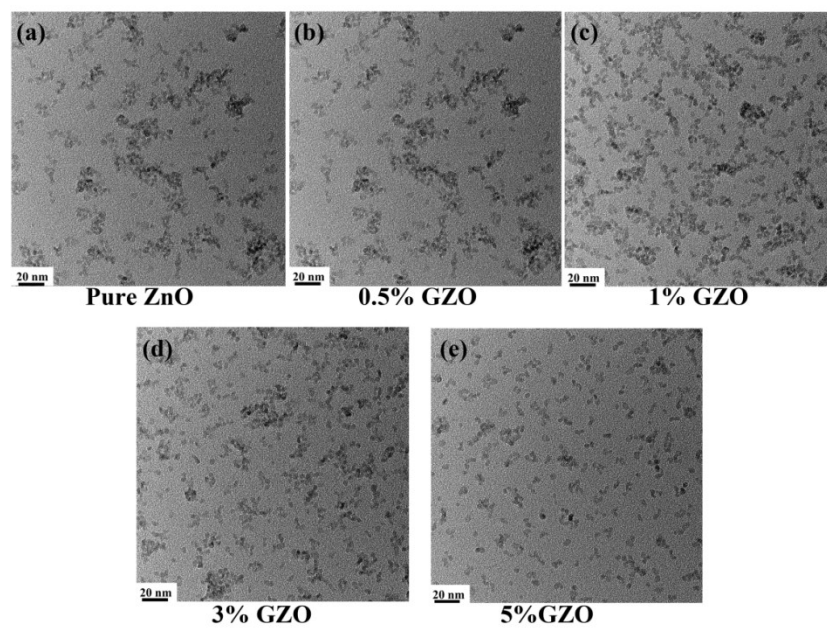

**Figure S1.** The TEM images of as-prepared pure ZnO NPs and a series of GZO NPs.

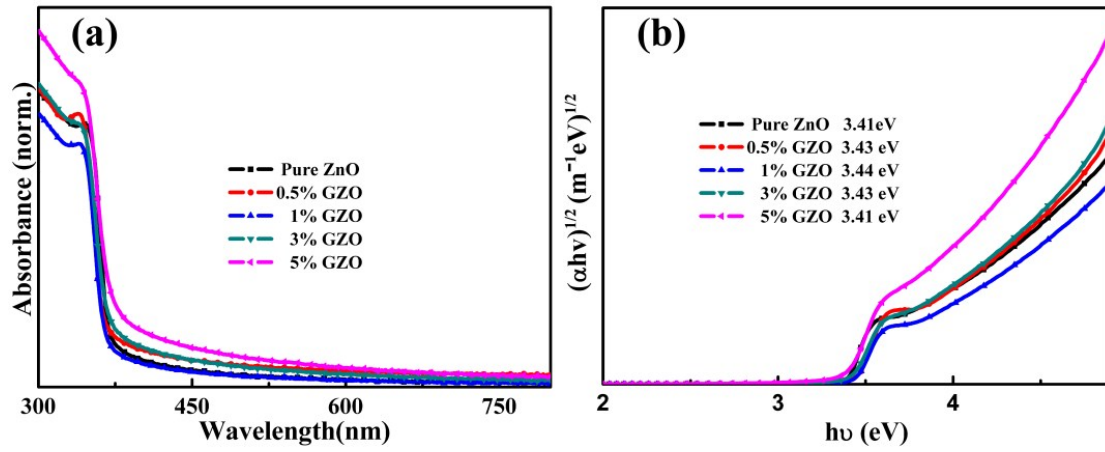

**Figure S2.** (a) UV-visible absorption spectra of the as-prepared pure ZnO and a series of GZO films. (b)  $(\alpha h\nu)^{1/2}$  verse photon energy ( $h\nu$ ) for as-prepared pure ZnO and a series of GZO films.  $E_g$  were extracted from corresponding data.

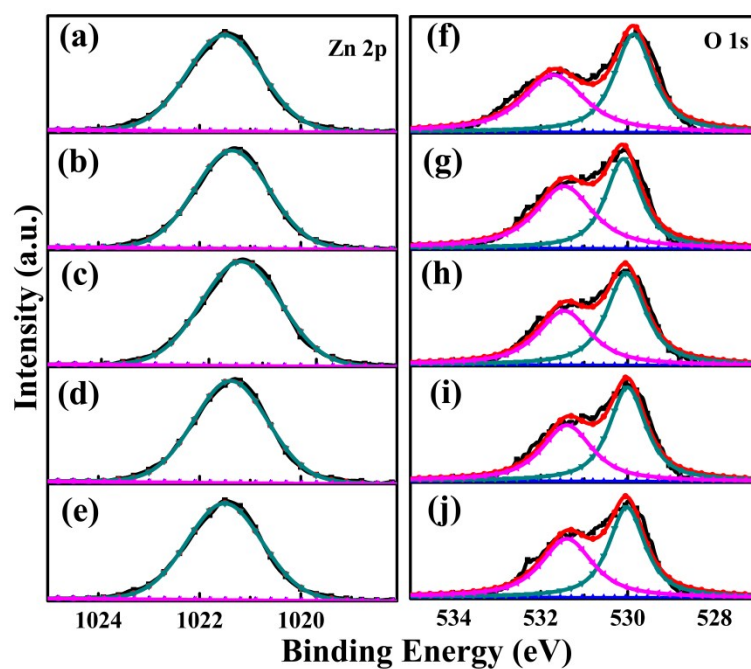

**Figure S3.** The survey XPS spectra of as-prepared pure ZnO and a series of GZO NPs films. Left panel: Zn  $2p_{3/2}$  spectra, (a) pure ZnO, (b) 0.5% GZO, (c) 1% GZO, (d) 3% GZO, (e) 5% GZO. Right panel: O  $1s$  spectra, (f) pure ZnO, (g) 0.5% GZO, (h) 1% GZO, (i) 3% GZO, (j) 5% GZO.

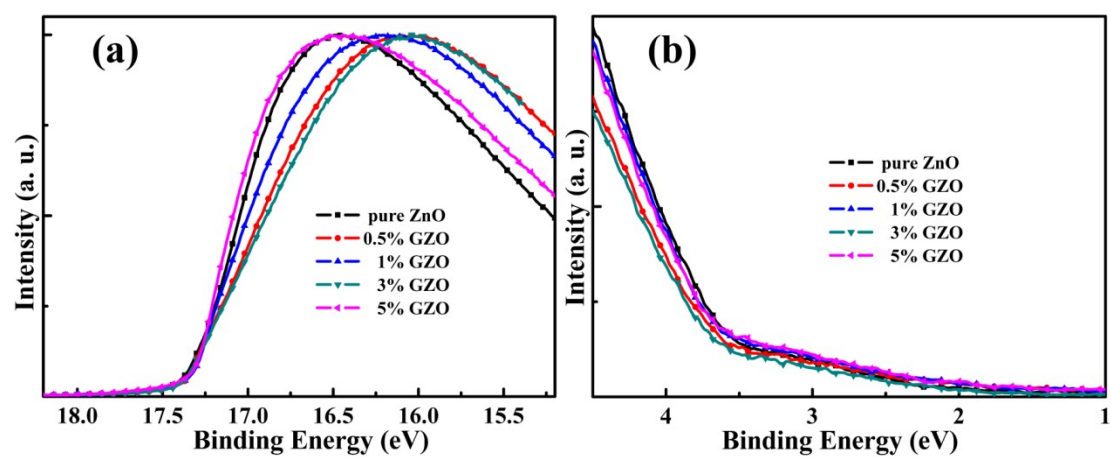

**Figure S4.** UPS spectra of the pure ZnO and a series of GZO films: (a) secondary electron cut-off region, (b) density of states near the VB edge.

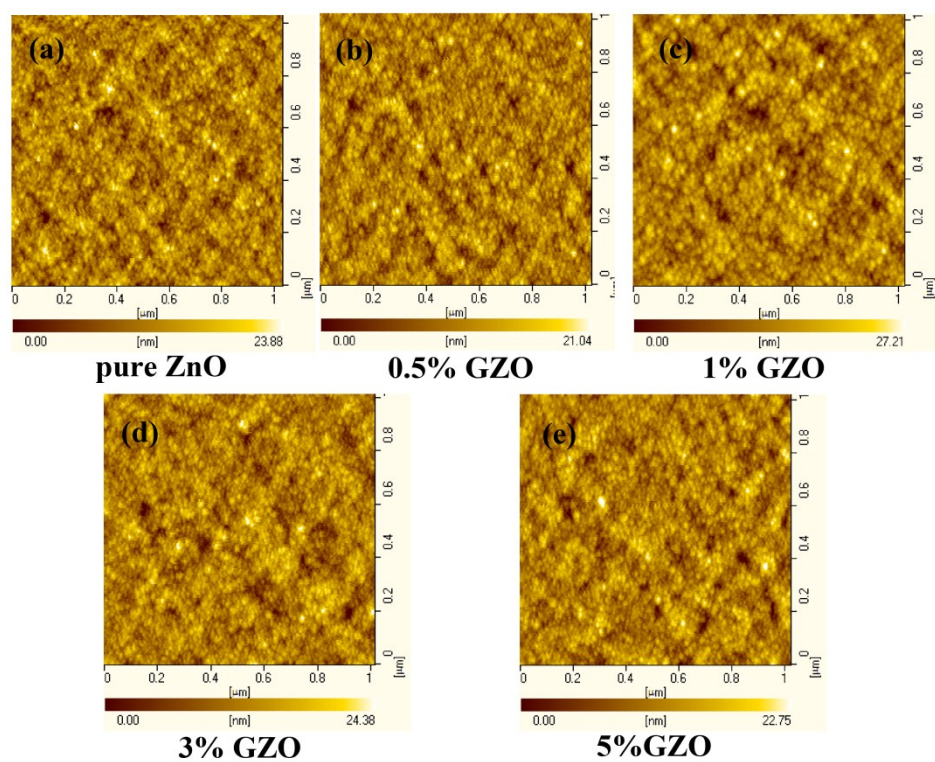

**Figure S5.** AFM images of the as-prepared pure ZnO NPs and a series of GZO NPs films.

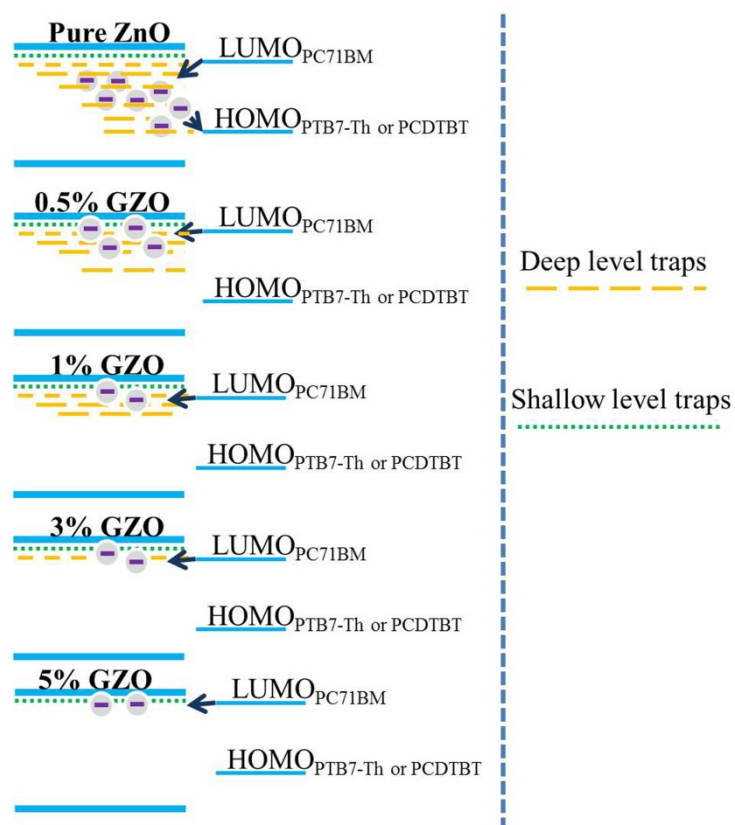

**Figure S6.** Illustration of surface trap distribution in pure ZnO and a series of GZO NPs films and enhanced charge extraction at the interfaces.



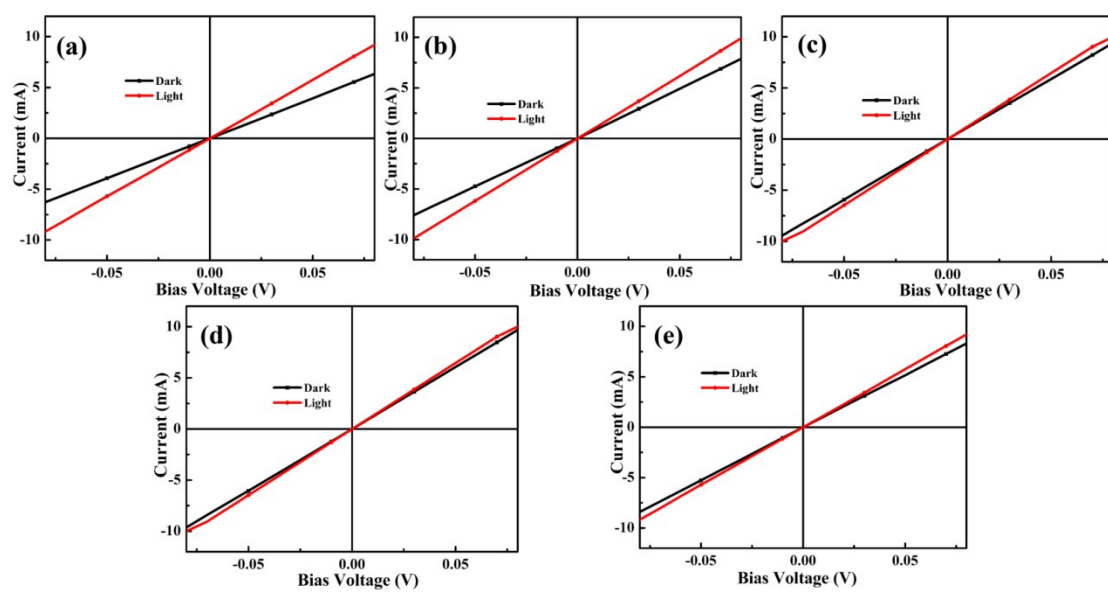

**Figure S7.**  $I$ - $V$  curves of the electron-only transfer devices under dark and illuminated conditions. (a) pure ZnO, (b) 0.5% GZO, (c) 1% GZO, (d) 3% GZO, (e) 5% GZO.

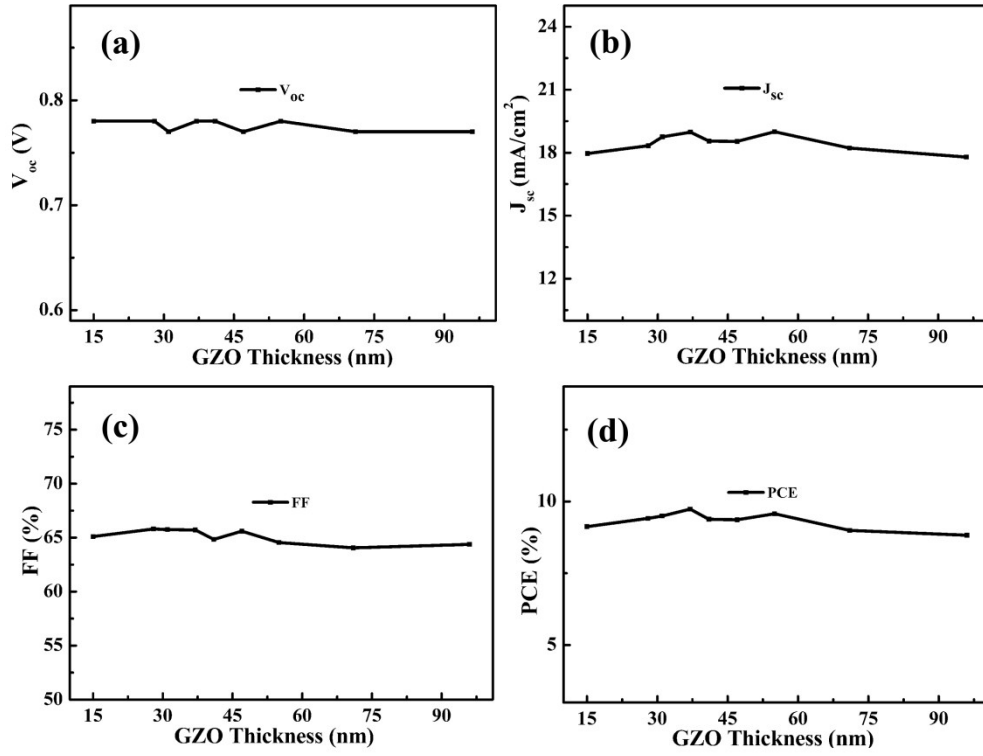

**Figure S8.** Device parameters of the PTB7-Th:PC<sub>71</sub>BM PSCs employing 3% GZO buffer layer with its thickness varying from 15 nm to 96 nm. (a)  $V_{oc}$ , (b)  $J_{sc}$ , (c) FF, and (d) PCE.

**Table S2.** Summarized photovoltaic parameters of the PCDTBT:PC<sub>71</sub>BM PSCs with pure ZnO or a series of GZO interfacial layers.

| PCDTBT:P <sub>71</sub> CBM | $V_{oc}$ (V) | $J_{sc}$ (mA cm <sup>-2</sup> ) |            | FF (%) | PCE (%)  |            |
|----------------------------|--------------|---------------------------------|------------|--------|----------|------------|
|                            |              | Measured                        | Calculated |        | Measured | Calculated |
| Pure ZnO                   | 0.90         | 13.05                           | 12.79      | 54.27  | 6.37     | 6.25       |
| 0.5% GZO                   | 0.91         | 13.49                           | 13.25      | 59.20  | 7.27     | 7.14       |
| 1% GZO                     | 0.90         | 13.56                           | 13.33      | 59.47  | 7.26     | 7.13       |
| 3% GZO                     | 0.91         | 13.68                           | 13.42      | 58.93  | 7.34     | 7.20       |
| 5% GZO                     | 0.91         | 13.62                           | 13.38      | 59.20  | 7.33     | 7.21       |
